# Supplementary material
Source: MDPI journal article supplement (https://www.mdpi.com/2073-4433/13/11/1937)
Supplement: s1 [file s1]

---

# Seasonal Variations in Concentrations and Chemical Compositions of TSP near a Bulk Material Storage Site for a Steel Plant

Yen-Yi Lee <sup>1,2,3</sup>, Sheng-Lun Lin <sup>4</sup>, Bo-Wun Huang <sup>5</sup>, Justus Kavita Mutuku <sup>1,2,3,\*</sup> and Guo-Ping Chang-Chien <sup>1,2,3,\*</sup>

<sup>1</sup> Institute of Environmental Toxin and Emerging-Contaminant, Cheng Shiu University, Kaohsiung 833301, Taiwan

<sup>2</sup> Super Micro Mass Research and Technology Centre, Cheng Shiu University, Kaohsiung 833301, Taiwan

<sup>3</sup> Center for Environmental Toxin and Emerging-Contaminant Research, Cheng Shiu University, Kaohsiung 833301, Taiwan

<sup>4</sup> School of Mechanical Engineering, Beijing Institute of Technology, Beijing 100081, China

<sup>5</sup> Department of Mechanical Engineering, Cheng Shiu University, Kaohsiung 833301, Taiwan

\* Correspondence: 6923@gcloud.csu.edu.tw (J.K.M.); guoping@gcloud.csu.edu.tw (G.-P.C.-C.)

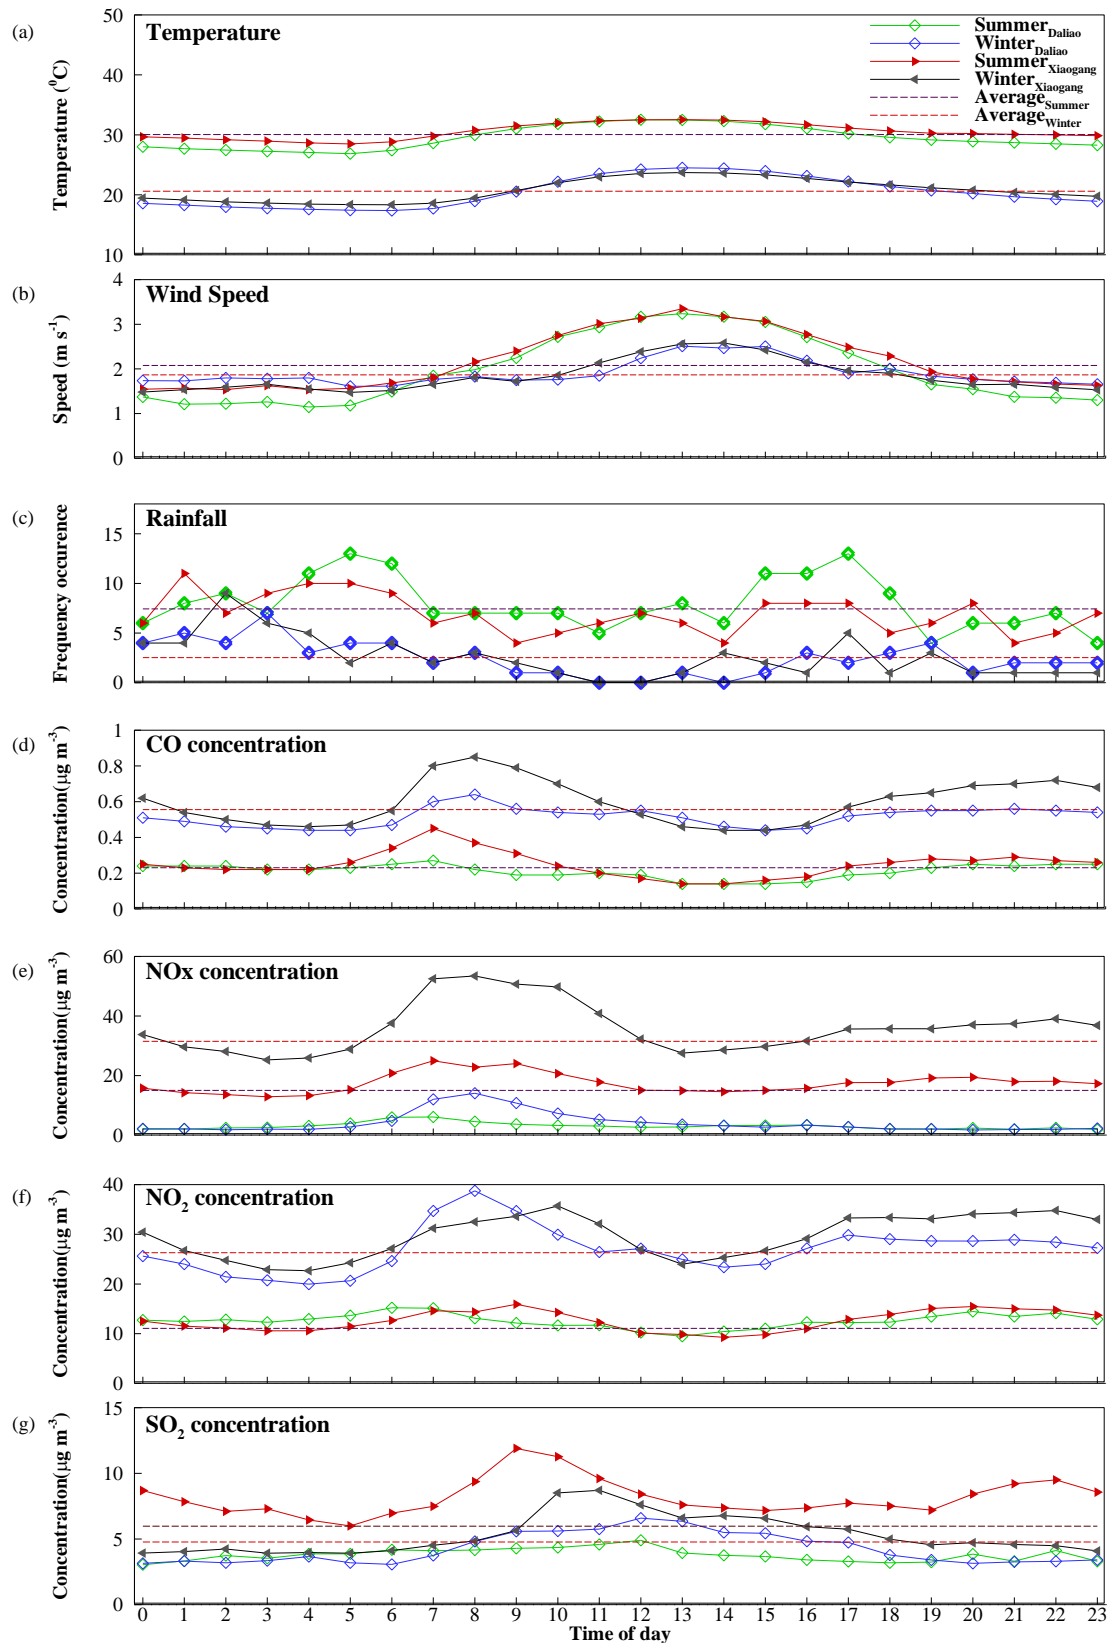

**Figure S1.** Diurnal variations in (a) temperature, (b) wind speed, (c) rainfall occurrence frequency, and concentrations of (d) CO, (e) NO<sub>x</sub>, (f) NO<sub>2</sub>, and SO<sub>2</sub> for summer and winter for Xiaogang and Daliao meteorological and air quality monitoring stations.

**Table S1.** Metal composition in suspended TSP at the steel company's administration building, elementary school A, elementary school B, and public library in summer and winter.

| Metal Elements | Summer                |                       |                       |                       | Winter                |                       |                       |                       |
|----------------|-----------------------|-----------------------|-----------------------|-----------------------|-----------------------|-----------------------|-----------------------|-----------------------|
|                | Site 1                | Site 2                | Site 3                | Site 4                | Site 1                | Site 2                | Site 3                | Site 4                |
| Na             | 4.04                  | 9.59                  | 8.46                  | 6.06                  | 2.96                  | 3.70                  | 3.53                  | 2.40                  |
| Mg             | 3.36                  | 0.97                  | 1.92                  | ND                    | 0.80                  | 0.88                  | 1.01                  | ND                    |
| Al             | 1.07                  | 0.15                  | 0.79                  | 0.51                  | 0.62                  | 0.90                  | 0.85                  | 0.78                  |
| Si             | ND                    | 0.80                  | 0.15                  | 1.01                  | ND                    | 1.19                  | 1.72                  | 1.36                  |
| K              | 1.23                  | 0.42                  | 1.06                  | 0.17                  | 0.75                  | 0.62                  | 0.84                  | 0.69                  |
| Ca             | 0.44                  | 0.49                  | 1.60                  | 0.89                  | 0.62                  | 0.53                  | 1.01                  | 0.67                  |
| Fe             | 0.40                  | 0.59                  | 0.39                  | 0.34                  | 3.65                  | 2.75                  | 2.91                  | 2.35                  |
| Ti             | $3.93 \times 10^{-3}$ | 0.01                  | $4.82 \times 10^{-3}$ | $4.01 \times 10^{-3}$ | 0.03                  | 0.03                  | 0.03                  | 0.02                  |
| V              | 0.01                  | 0.02                  | 0.01                  | 0.01                  | 0.03                  | 0.05                  | 0.02                  | 0.01                  |
| Cr             | 0.01                  | $3.20 \times 10^{-3}$ | $3.64 \times 10^{-3}$ | $3.42 \times 10^{-3}$ | 0.01                  | 0.01                  | 0.02                  | 0.01                  |
| Mn             | 0.02                  | 0.01                  | 0.01                  | 0.01                  | 0.16                  | 0.10                  | 0.09                  | 0.08                  |
| Co             | $1.30 \times 10^{-4}$ | $1.81 \times 10^{-4}$ | $1.64 \times 10^{-4}$ | $1.34 \times 10^{-4}$ | $1.56 \times 10^{-3}$ | $1.43 \times 10^{-3}$ | $1.40 \times 10^{-3}$ | $1.41 \times 10^{-3}$ |
| Ni             | 0.01                  | $4.96 \times 10^{-3}$ | $4.00 \times 10^{-3}$ | $3.52 \times 10^{-3}$ | 0.02                  | 0.03                  | 0.02                  | 0.01                  |
| Cu             | 0.01                  | 0.01                  | 0.04                  | 0.13                  | 0.07                  | 0.05                  | 0.08                  | 0.06                  |
| Zn             | 0.05                  | 0.08                  | 0.02                  | 0.02                  | 0.58                  | 0.42                  | 0.49                  | 0.33                  |
| As             | $1.41 \times 10^{-3}$ | $6.17 \times 10^{-4}$ | $3.90 \times 10^{-4}$ | $3.79 \times 10^{-4}$ | $3.15 \times 10^{-3}$ | $3.23 \times 10^{-3}$ | $3.06 \times 10^{-3}$ | $3.45 \times 10^{-3}$ |
| Se             | $3.92 \times 10^{-3}$ | $4.08 \times 10^{-4}$ | $3.91 \times 10^{-4}$ | $4.41 \times 10^{-4}$ | $2.38 \times 10^{-3}$ | $2.72 \times 10^{-3}$ | $3.52 \times 10^{-3}$ | $2.66 \times 10^{-3}$ |
| Sn             | $1.72 \times 10^{-3}$ | $2.02 \times 10^{-3}$ | $1.05 \times 10^{-3}$ | $1.42 \times 10^{-3}$ | $4.25 \times 10^{-3}$ | 0.01                  | $4.71 \times 10^{-3}$ | 0.01                  |
| Cs             | $9.71 \times 10^{-4}$ | ND                    | $6.33 \times 10^{-5}$ | ND                    | $2.07 \times 10^{-4}$ | ND                    | $2.37 \times 10^{-4}$ | ND                    |
| Pb             | 0.03                  | $4.85 \times 10^{-3}$ | $4.44 \times 10^{-3}$ | 0.01                  | 0.04                  | 0.04                  | 0.05                  | 0.06                  |
| <b>Total</b>   | 10.69                 | 13.14                 | 14.48                 | 9.16                  | 10.36                 | 11.31                 | 12.67                 | 8.86                  |

Note: **Site 1** refers to the Steel company administration building

**Site 2** refers to Elementary school A

**Site 3** refers to Elementary school B

**Site 4** refers to Public library

**Table S2.** Chronic Daily Occupational Exposure to Potentially toxic elements contained in TSP at the steel company's administration building, elementary school A, elementary school B, and public library in summer and winter.

| Chronic (70-year average) Daily Occupational Exposure ( $\text{mg kg}^{-1} \text{ day}^{-1}$ ) = Air volume ( $\text{m}^3$ )*Concentration ( $\mu\text{g m}^{-3}/10^3 \mu\text{g mg}^{-1}$ )/70kg<br>=(8hours $\text{day}^{-1} \times 60 \text{ mins hour}^{-1} \times 0.015 \text{ m}^3 \text{ min}^{-1}$ )* Concentration ( $\text{mg m}^{-3}$ )/70 kg |                                       |                                 |                          |                       |                                |                                 |                          |                       |                       |
|----------------------------------------------------------------------------------------------------------------------------------------------------------------------------------------------------------------------------------------------------------------------------------------------------------------------------------------------------------|---------------------------------------|---------------------------------|--------------------------|-----------------------|--------------------------------|---------------------------------|--------------------------|-----------------------|-----------------------|
|                                                                                                                                                                                                                                                                                                                                                          | Steel compay administrat ion building |                                 |                          |                       | Steel compay admin building    |                                 |                          |                       |                       |
|                                                                                                                                                                                                                                                                                                                                                          | Fenglin (Elementar y school A)        | Fengming (Elementar y school B) | Linyuan (Public library) |                       | Fenglin (Elementar y school A) | Fengming (Elementar y school B) | Linyuan (Public library) |                       |                       |
| Carcinogenic                                                                                                                                                                                                                                                                                                                                             | Cr                                    | $1.18 \times 10^{-6}$           | $3.29 \times 10^{-7}$    | $3.74 \times 10^{-7}$ | $3.52 \times 10^{-7}$          | $1.36 \times 10^{-6}$           | $1.28 \times 10^{-6}$    | $1.55 \times 10^{-6}$ | $1.39 \times 10^{-6}$ |
|                                                                                                                                                                                                                                                                                                                                                          | Co                                    | $1.34 \times 10^{-8}$           | $1.86 \times 10^{-8}$    | $1.68 \times 10^{-8}$ | $1.38 \times 10^{-8}$          | $1.61 \times 10^{-7}$           | $1.47 \times 10^{-7}$    | $1.44 \times 10^{-7}$ | $1.45 \times 10^{-7}$ |
|                                                                                                                                                                                                                                                                                                                                                          | Ni                                    | $9.31 \times 10^{-7}$           | $5.10 \times 10^{-7}$    | $4.12 \times 10^{-7}$ | $3.62 \times 10^{-7}$          | $2.03 \times 10^{-6}$           | $2.83 \times 10^{-6}$    | $2.20 \times 10^{-6}$ | $1.40 \times 10^{-6}$ |
|                                                                                                                                                                                                                                                                                                                                                          | As                                    | $1.45 \times 10^{-7}$           | $6.35 \times 10^{-8}$    | $4.01 \times 10^{-8}$ | $3.89 \times 10^{-8}$          | $3.24 \times 10^{-7}$           | $3.32 \times 10^{-7}$    | $3.15 \times 10^{-7}$ | $3.54 \times 10^{-7}$ |
|                                                                                                                                                                                                                                                                                                                                                          | Pb                                    | $2.90 \times 10^{-6}$           | $4.99 \times 10^{-7}$    | $4.56 \times 10^{-7}$ | $5.28 \times 10^{-7}$          | $4.31 \times 10^{-6}$           | $3.90 \times 10^{-6}$    | $4.72 \times 10^{-6}$ | $6.37 \times 10^{-6}$ |

|                  |    |                       |                       |                       |                       |                       |                       |                       |                       |
|------------------|----|-----------------------|-----------------------|-----------------------|-----------------------|-----------------------|-----------------------|-----------------------|-----------------------|
| Non-carcinogenic | Mn | 2.41×10 <sup>-6</sup> | 9.70×10 <sup>-7</sup> | 1.22×10 <sup>-6</sup> | 7.89×10 <sup>-7</sup> | 1.69×10 <sup>-5</sup> | 1.00×10 <sup>-5</sup> | 9.09×10 <sup>-6</sup> | 7.84×10 <sup>-6</sup> |
|                  | Cu | 1.20×10 <sup>-6</sup> | 9.13×10 <sup>-7</sup> | 4.50×10 <sup>-6</sup> | 1.36×10 <sup>-5</sup> | 6.72×10 <sup>-6</sup> | 5.11×10 <sup>-6</sup> | 8.08×10 <sup>-6</sup> | 6.32×10 <sup>-6</sup> |
|                  | Zn | 4.90×10 <sup>-6</sup> | 8.11×10 <sup>-6</sup> | 2.45×10 <sup>-6</sup> | 2.25×10 <sup>-6</sup> | 5.97×10 <sup>-5</sup> | 4.36×10 <sup>-5</sup> | 5.04×10 <sup>-5</sup> | 3.37×10 <sup>-5</sup> |

**Table S3.** Pearson r correlation values between Average TSP concentrations and the metal elements, water soluble ions, elemental and organic carbon.

|                            | Average TSP concentrations   |                |
|----------------------------|------------------------------|----------------|
|                            | Pearson r correlation values | P-value        |
| <b>Metal elements</b>      | 0.95                         | <i>P</i> <.001 |
| <b>Water soluble ions</b>  | 0.96                         | <i>P</i> <.001 |
| <b>Elemental Carbon</b>    | 0.95                         | <i>P</i> <.001 |
| <b>Organic Carbon</b>      | 0.8                          | <i>P</i> =.02  |
| <b>Note;</b> n=8<br>Df = 6 |                              |                |
